# Supplementary material
Source: PubMed Central journal article supplement (PMC7919726)
Supplement: jci-131-138935-s197.pdf [file jci-131-138935-s197.pdf]

| Primer name | Sequence 5' to 3'              |
|-------------|--------------------------------|
| ASL F2      | agatgcctacataccattcctctgcccttg |
| ASL R3      | aaagggtagggtcagcaaggggtgaatgag |
| ASL F3      | tcactttagtccttcagcccagcttcttc  |
| ASL R4      | tgagcaatacccgatggtgcctgaaatg   |
| ASL F6a     | attctgaggtgagccaggtgagg        |
| ASL R8a     | agtccttgagggtcatcaggag         |
| ASL F1      | actttgggaagctgaggctggaggacag   |
| ASL R4      | tgagcaatacccgatggtgcctgaaatg   |
| asL4        | atgctccagactgccttgggaaaagcg    |
| sR6         | tctatggcttctgaggcggaagaaccag   |

**Supplemental Table 1. ASL primers for cloning, PCR and sequencing**
