# Supplementary material
Source: PubMed Central journal article supplement (PMC7919726)
Supplement: jci-131-138935-s198.pdf [file jci-131-138935-s198.pdf]

| Participant | Gender | Age in yrs | History of HA | 2 or more episodes of HA | Liver transplantation | Use of nitrogen-scavenging medications | Height in cm (Z-score) | Weight in kg (Z-score) | Prescribed dose of arginine in g/m <sup>2</sup> of BSA | Prescribed protein from diet in mg/kg | Prescribed protein per day from formula in mg/kg | Total protein prescribed from diet and supplemental formula per day as % of DRI | Pathogenic variants in ASL                         | LS aBMD Z-score | History of fracture prior to study enrollment (bone(s) fractured) <sup>b</sup> |
|-------------|--------|------------|---------------|--------------------------|-----------------------|----------------------------------------|------------------------|------------------------|--------------------------------------------------------|---------------------------------------|--------------------------------------------------|---------------------------------------------------------------------------------|----------------------------------------------------|-----------------|--------------------------------------------------------------------------------|
| 1           | M      | 11         | +             | +                        | -                     | +                                      | 129.5 (-2.3)           | 34 (-0.5)              | 1.9                                                    | 0.67                                  | 0.22                                             | 100                                                                             | Allele 1: p.Met256fs<br>Allele 2: p.Ala398Asp      | -1.7            | Yes (cuboid and tibia)                                                         |
| 2           | F      | 8          | +             | -                        | -                     | +                                      | 128.7 (-0.2)           | 30 (0.6)               | 3.8                                                    | 0.53                                  | 0.36                                             | 93                                                                              | na                                                 | 0.4             | No                                                                             |
| 3           | F      | 9          | +             | +                        | +                     | -                                      | 148.9 (2.3)            | 56 (2.5)               | -                                                      | Unrestricted                          | -                                                | na                                                                              | Allele 1: p.Arg186Gln<br>Allele 2: p.Arg193Gln     | 1.5             | Yes (clavicle)                                                                 |
| 4           | M      | 6          | -             | -                        | -                     | +                                      | 114.6 (-0.5)           | 22 (0.1)               | 4.5                                                    | 0.6                                   | 0.6                                              | 91                                                                              | Allele 1: p.Arg217Ter<br>Allele 2: p.Ser447Asn     | 0.2             | No                                                                             |
| 5           | M      | 7          | +             | +                        | -                     | +                                      | 129.8 (1.1)            | 30.8 (1.4)             | 6.6                                                    | 0.6                                   | 0.54                                             | 121                                                                             | Allele 1: p.Leu419fs<br>Allele 2: p.Ser447Asn      | 0.7             | No                                                                             |
| 6           | F      | 31         | -             | -                        | -                     | -                                      | 164.7 <sup>a</sup>     | 60.3 <sup>a</sup>      | 1.4                                                    | 0.66                                  | -                                                | 83                                                                              | Allele 1: c.446+1G>A<br>Allele 2: NA               | -1.1            | No                                                                             |
| 7           | M      | 11         | +             | +                        | -                     | +                                      | 130.1 (-2.3)           | 31.7 (-1.1)            | 2.4                                                    | 0.55                                  | 0.15                                             | 74                                                                              | na                                                 | -4.7            | No                                                                             |
| 8           | M      | 9          | -             | -                        | -                     | +                                      | 129.4 (-0.5)           | 27.8 (0.1)             | 2.7                                                    | 0.9                                   | -                                                | 68                                                                              | Allele 1: p.Arg12Gln<br>Allele 2: p.Val349Cysfs*72 | -0.6            | No                                                                             |
| 9           | M      | 8          | -             | -                        | -                     | -                                      | 125.7 (-1.0)           | 30.7 (0.6)             | 4.8                                                    | 0.58                                  | -                                                | 61                                                                              | Allele 1: p.Val178Met<br>Allele 2: p.Val178Met     | 0.7             | No                                                                             |
| 10          | M      | 6          | -             | -                        | -                     | +                                      | 112.5 (-0.7)           | 19.7 (-0.5)            | 3.8                                                    | 0.6                                   | 0.6                                              | 124                                                                             | Allele 1: p.Arg217Ter<br>Allele 2: p.Ser447Asn     | -2.4            | No                                                                             |
| 11          | M      | 21         | +             | +                        | +                     | -                                      | 178.9 <sup>a</sup>     | 65.2 <sup>a</sup>      | 1.1                                                    | Unrestricted                          | -                                                | na                                                                              | na                                                 | -0.7            | Yes (skull bones)                                                              |
| 12          | M      | 20         | +             | +                        | +                     | -                                      | 171.8 <sup>a</sup>     | 77.72 <sup>a</sup>     | -                                                      | Unrestricted                          | -                                                | na                                                                              | Allele 1: p.Gln286Arg<br>Allele 2: na              | 0.5             | No                                                                             |

**Supplemental Table 2: Characteristics of individuals with ASLD who were enrolled in the study.** Plus and minus signs denote the presence and absence of a characteristic, respectively. <sup>a</sup> Height and weight Z-scores are not calculable as the age of the participant is above 20 years. <sup>b</sup> Presence or absence of fracture was based on self- or parent-report. M – male, F-Female; HA hyperammonemia; DRI daily recommended intake; ASL Argininosuccinate lyase; aBMD areal bone mineral density; LS Lumbar spine; na – datum not available
