# Supplementary material
Source: PubMed Central journal article supplement (PMC7919726)
Supplement: jci-131-138935-s199.pdf [file jci-131-138935-s199.pdf]

| Participant | Gender | Age in yrs | Ocn in ng/ml | Ocn normal reference range for age in ng/ml <sup>a</sup> | BsALP in µg/L | BsALP normal reference range for age in µg/L <sup>a</sup> | CTX in pg/mL | CTX normal reference range for age in pg/ml <sup>a</sup> |
|-------------|--------|------------|--------------|----------------------------------------------------------|---------------|-----------------------------------------------------------|--------------|----------------------------------------------------------|
| 1           | M      | 11         | 72           | 49-167                                                   | 61.2          | 48.8-155.5                                                | 1343         | 519-2415                                                 |
| 2           | F      | 8          | 43           | 47-142                                                   | 63.4          | 41-134.6                                                  | 1171         | 574-1849                                                 |
| 3           | F      | 9          | 130          | 47-142                                                   | 61.2          | 41-134.6                                                  | 1127         | 574-1849                                                 |
| 4           | M      | 6          | 96           | 47-142                                                   | 64.1          | 41-134.6                                                  | 1749         | 574-1849                                                 |
| 5           | M      | 7          | 71           | 47-142                                                   | 78.8          | 41-134.6                                                  | 1604         | 574-1849                                                 |
| 6           | F      | 31         | 16           | 8-32                                                     | #             |                                                           | #            |                                                          |
| 7           | M      | 11         | 58           | 49-167                                                   | 39.8          | 43.8-177.4                                                | 883          | 519-2415                                                 |
| 8           | M      | 9          | 61           | 47-142                                                   | 32.7          | 41-134.6                                                  | 1588         | 574-1849                                                 |
| 9           | M      | 8          | 100          | 47-142                                                   | 60.4          | 41-134.6                                                  | 670          | 574-1849                                                 |
| 10          | M      | 6          | 67           | 47-142                                                   | 41.4          | 41-134.6                                                  | 1011         | 574-1849                                                 |
| 11          | M      | 21         | 44           | 9-38                                                     | 15.5          | 8.4-29.3                                                  | 987          | 87-1200                                                  |
| 12          | M      | 20         | #            |                                                          | 14            | 8.4-29.3                                                  | 490          | 87-1200                                                  |

**Supplemental Table 3: Bone turnover markers in individuals with ASLD enrolled in the study.**

<sup>a</sup> The age-specific normal ranges are those that are used by the CLIA-certified clinical diagnostic laboratory.

# - The diagnostic laboratory could not assess the marker due to technical issues with the sample that they received.

M – male; F-Female; Ocn – osteocalcin; BsALP – bone specific alkaline phosphatase; CTX – C terminal telopeptide.
